# Supplementary material
Source: PubMed Central journal article supplement (PMC3368803)

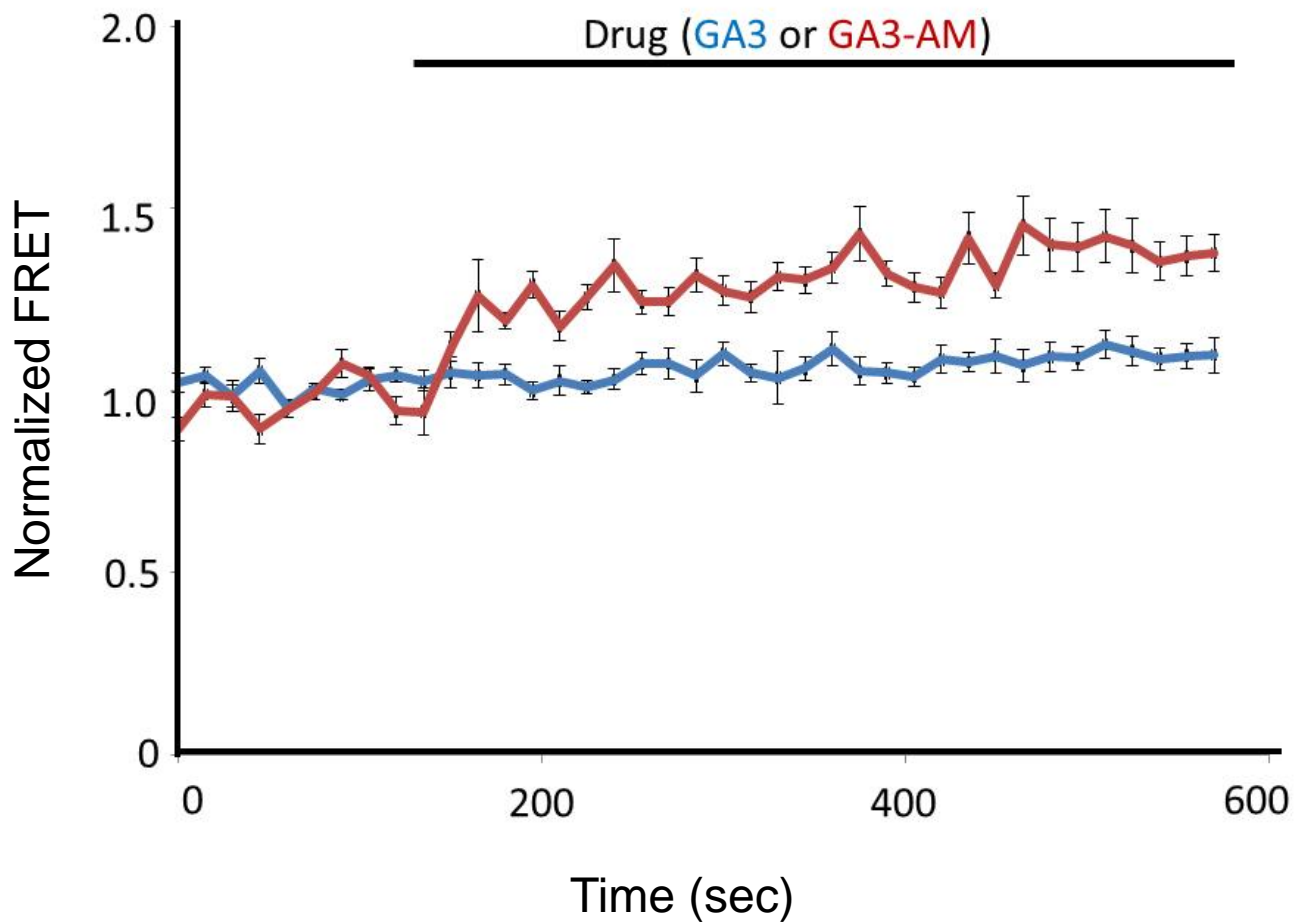

Supplementary Figure 1, Miyamoto and DeRose et al.

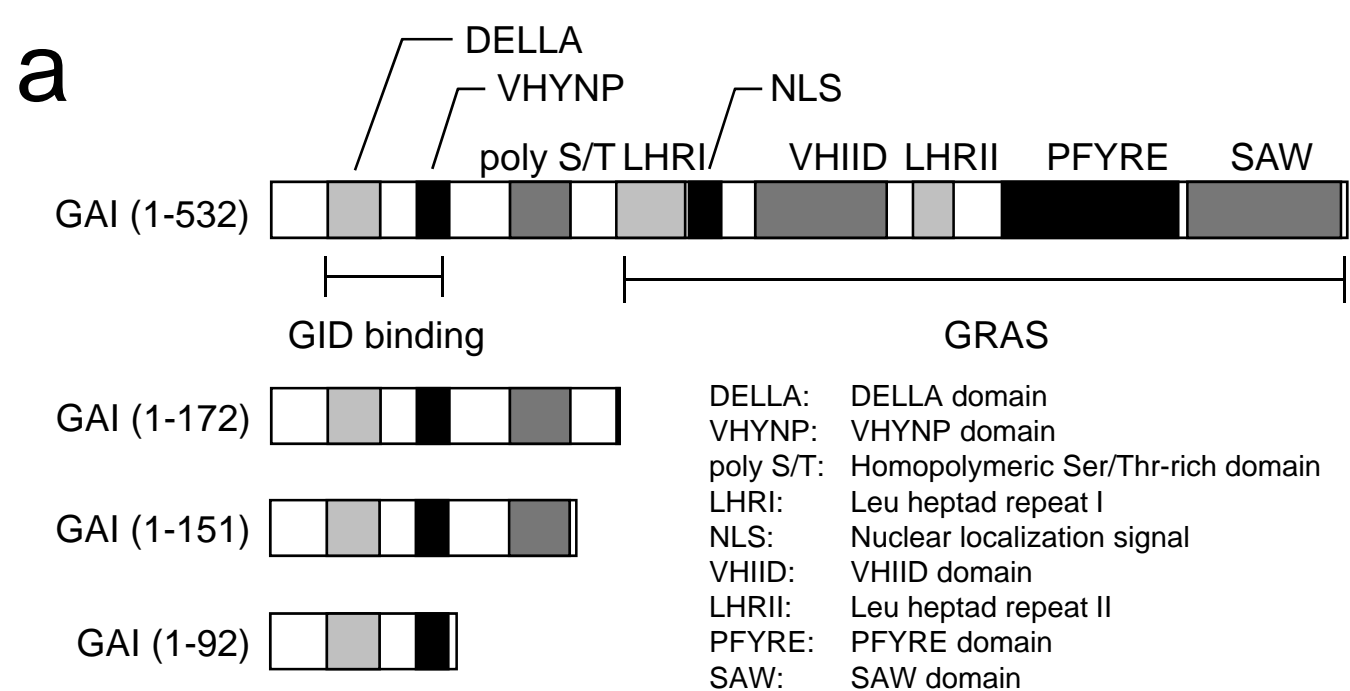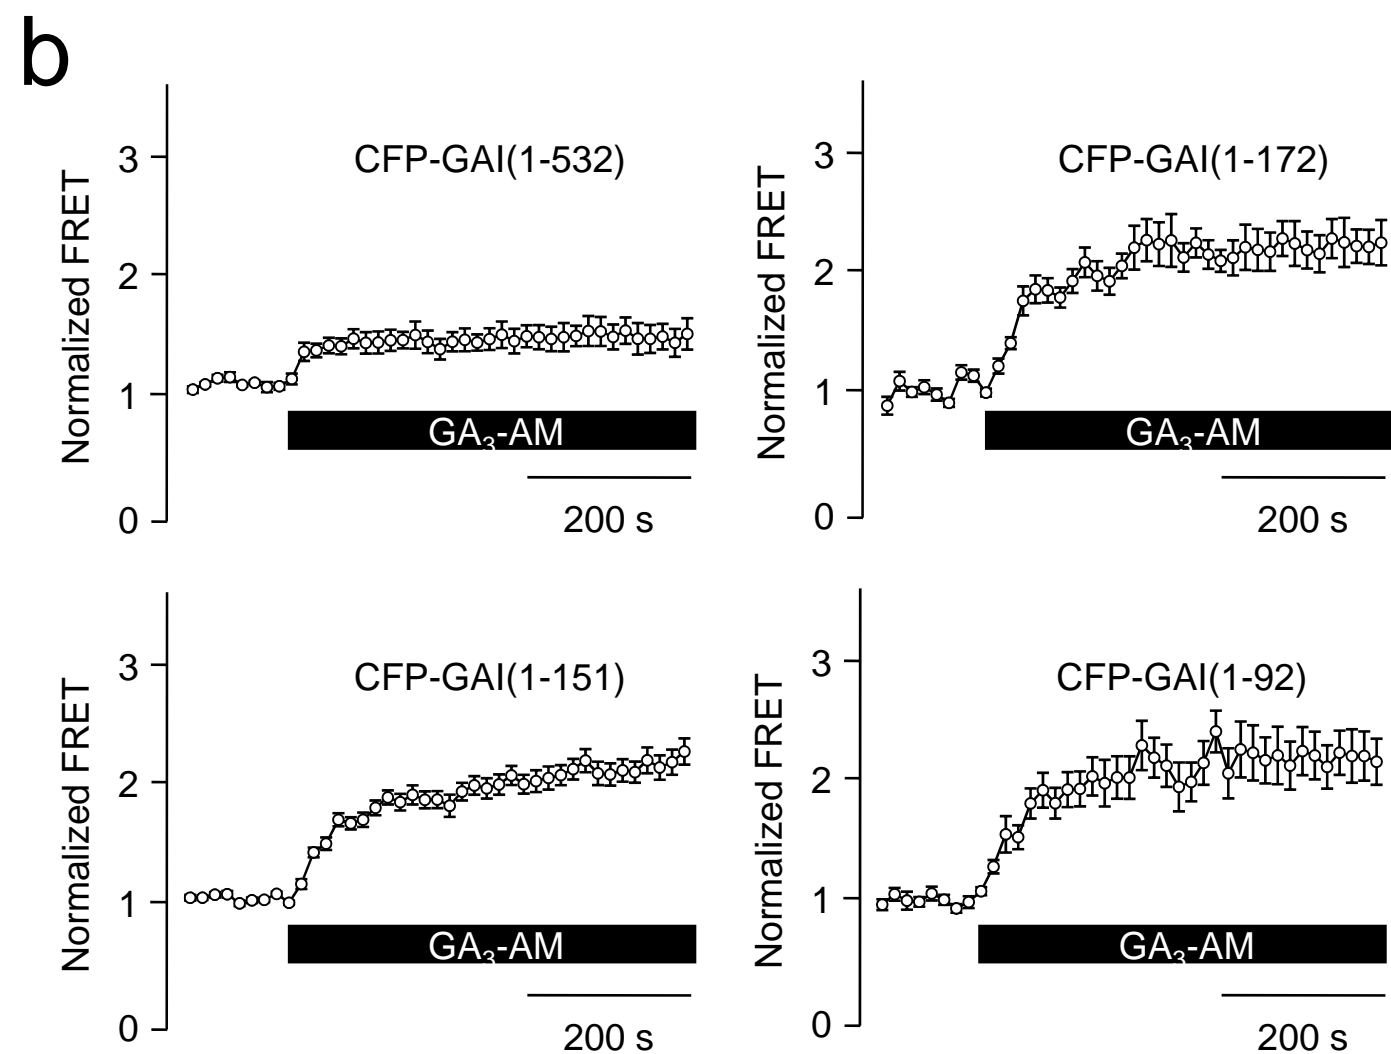

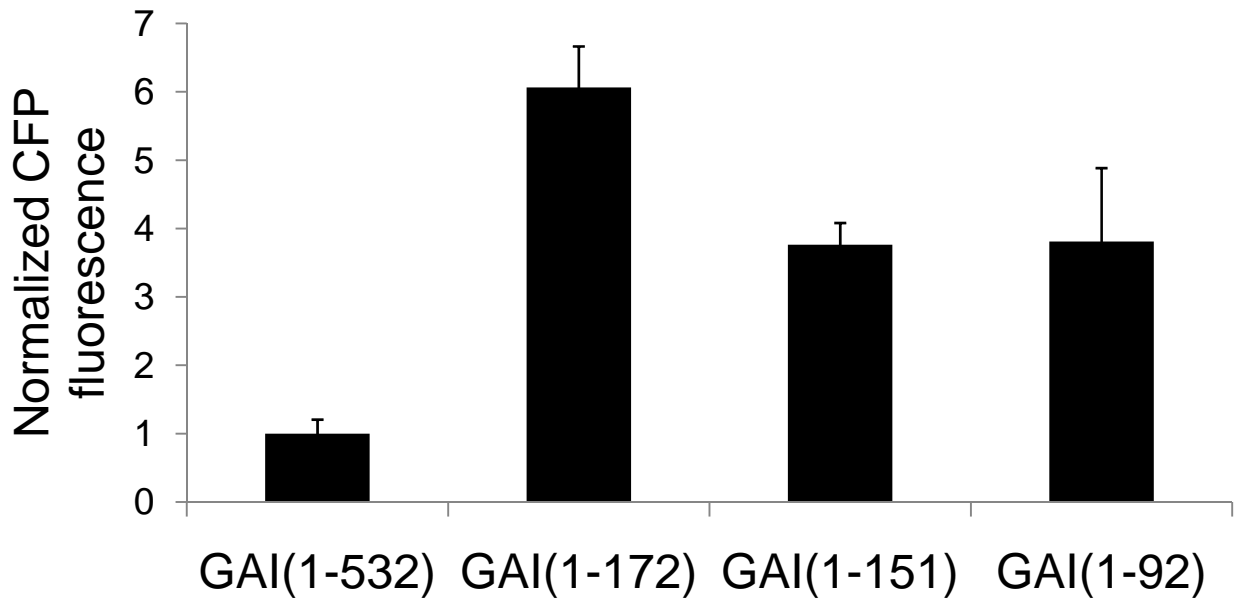

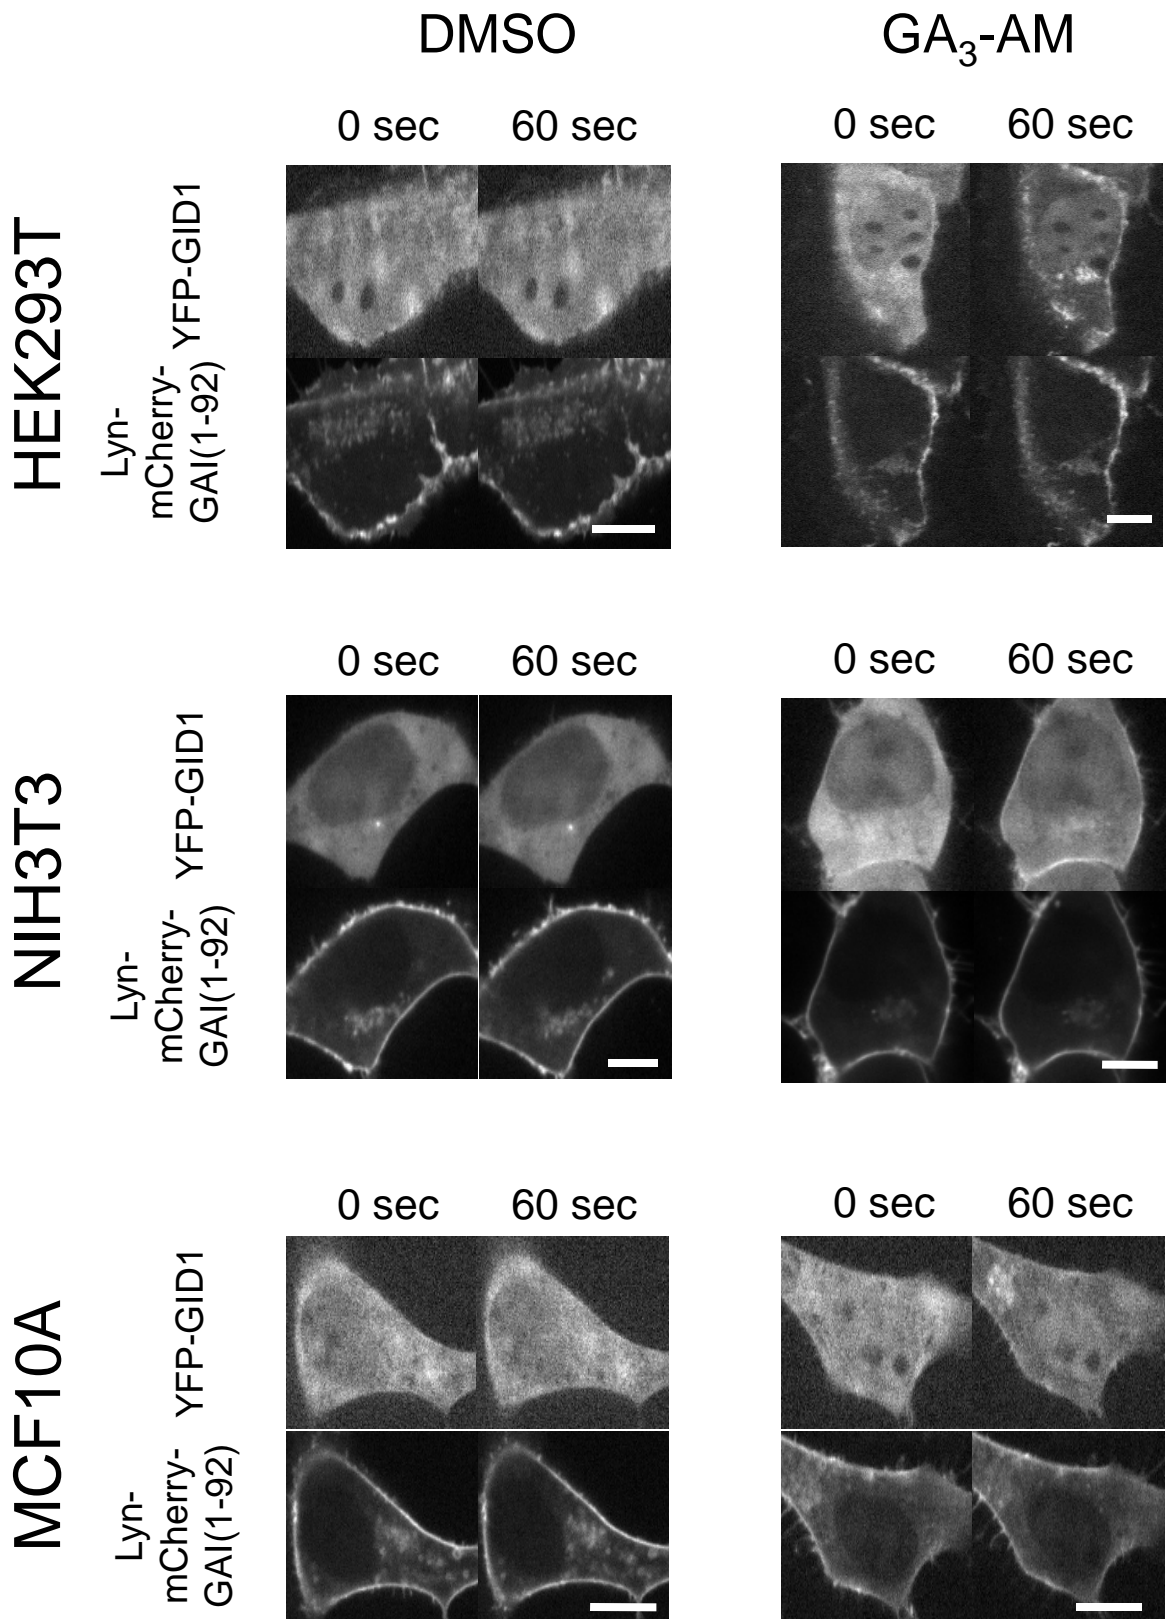

Supplementary Figure 4, Miyamoto and DeRose et al.

**a**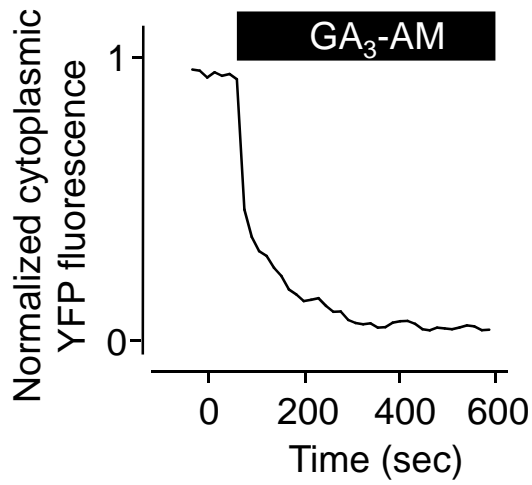**b**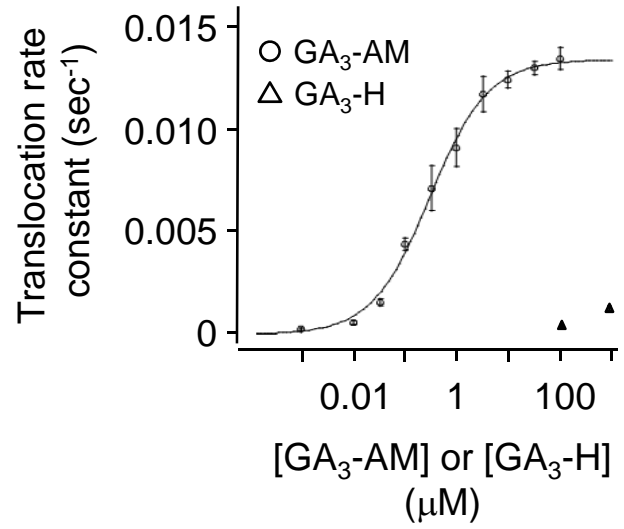**c**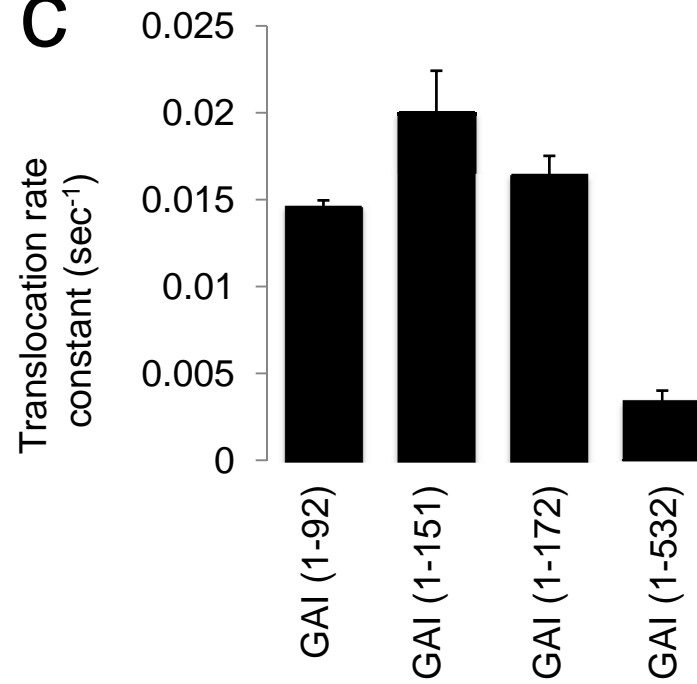

Normalized fluorescence  
Intensity of Calcein-AM

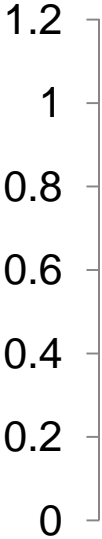

5 min

Calcein-AM

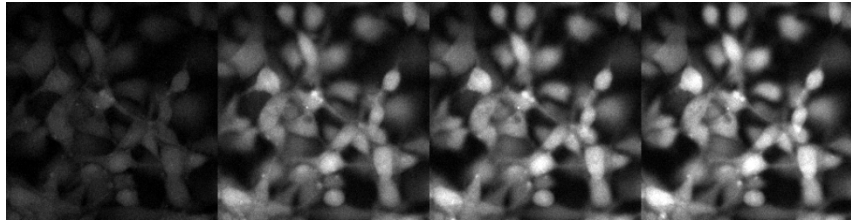

0 min

5 min

10 min

15 min

**a**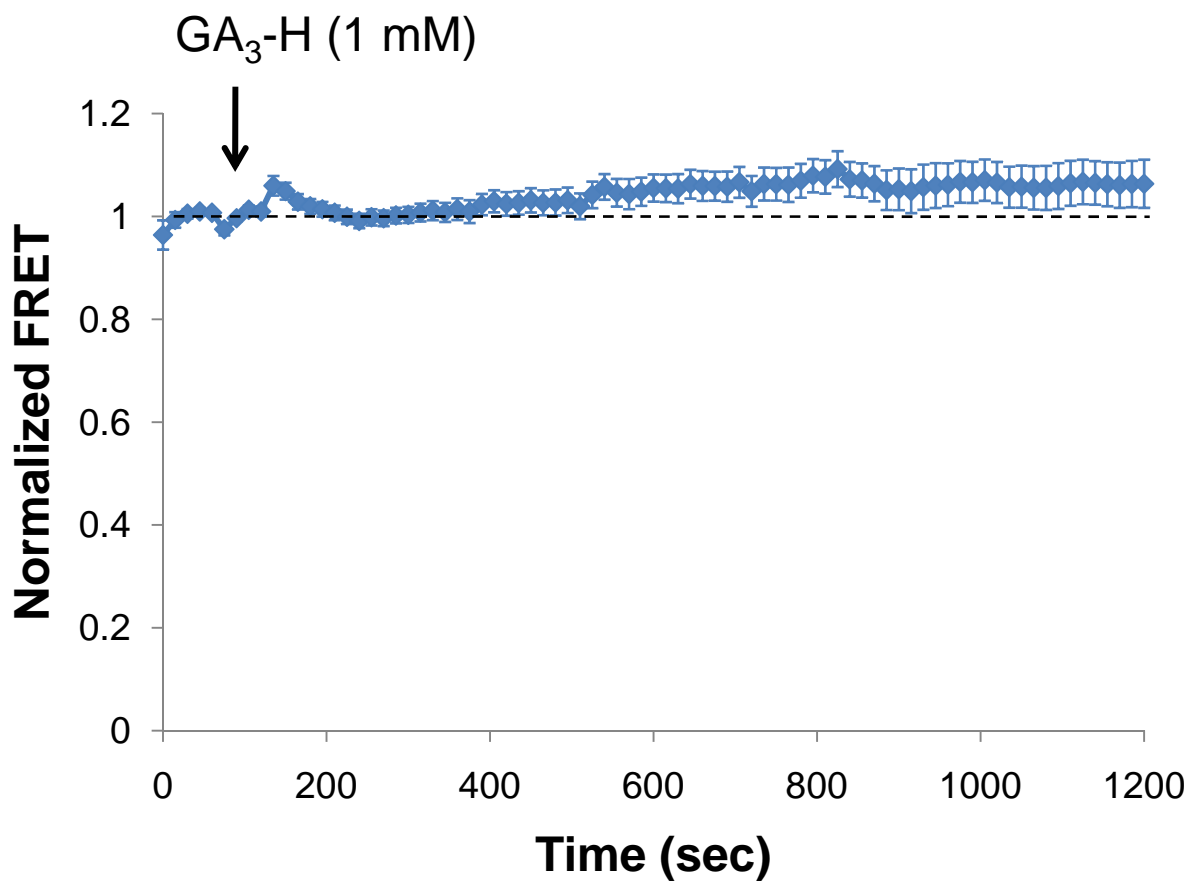**b**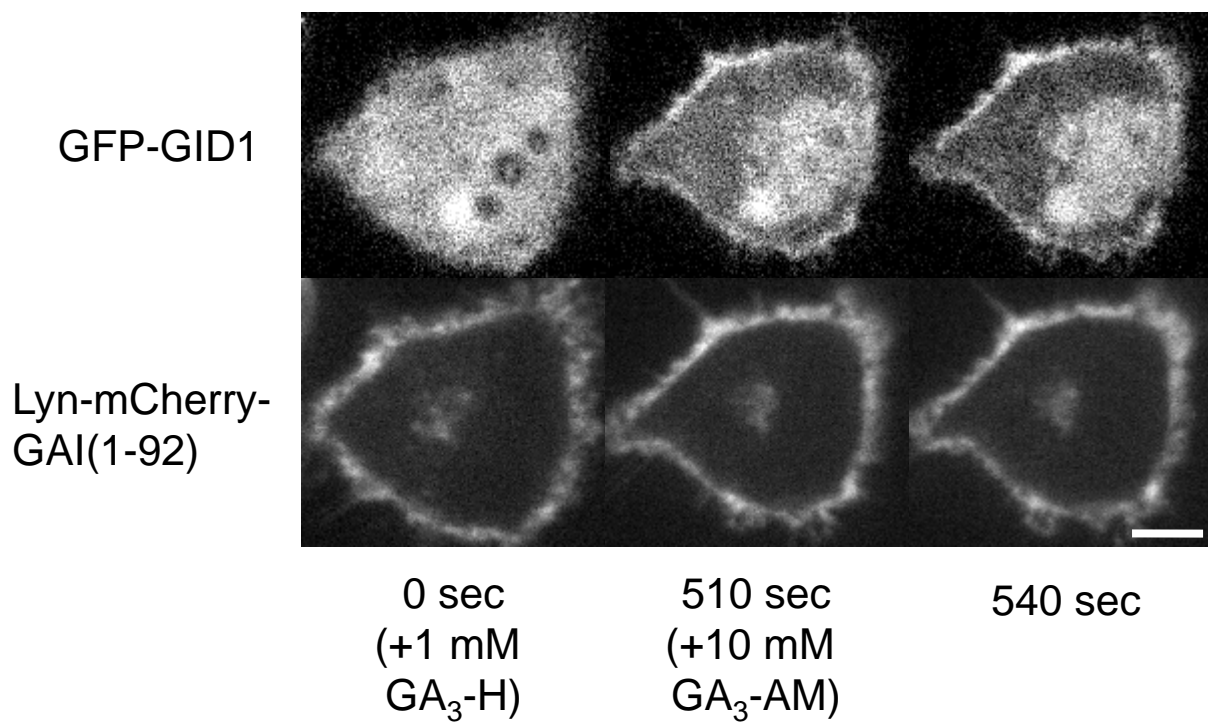

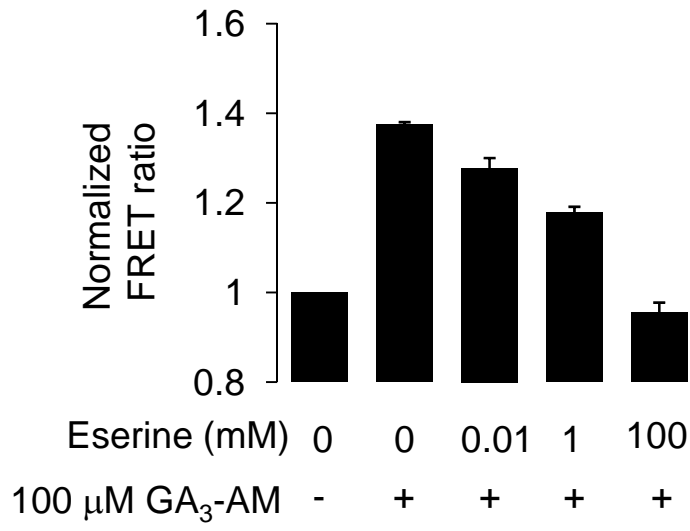



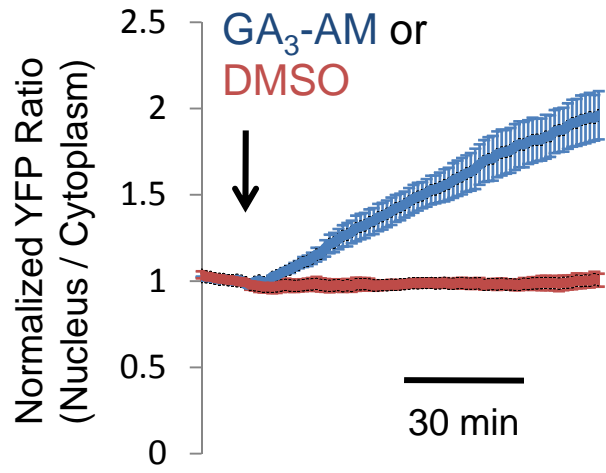

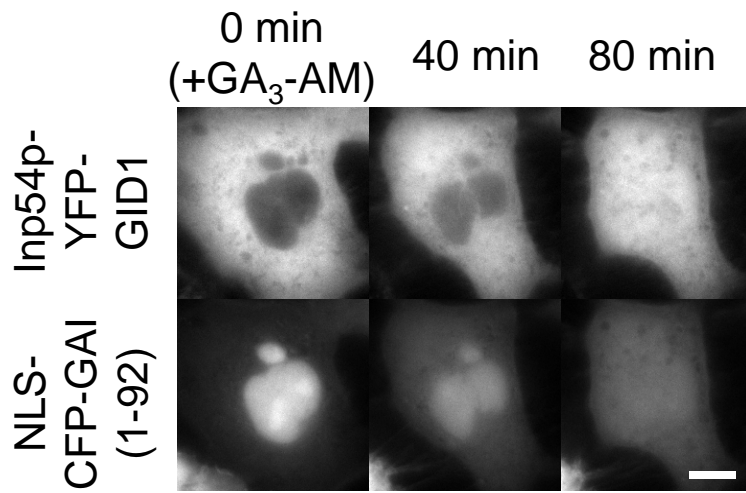

Rapamycin + GA<sub>3</sub>-AM

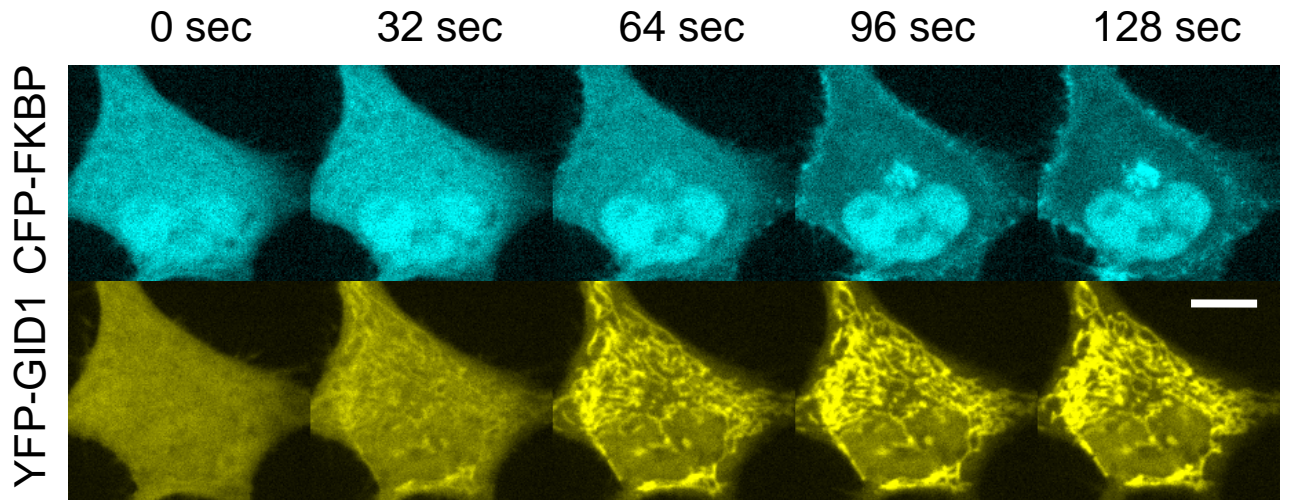

**a**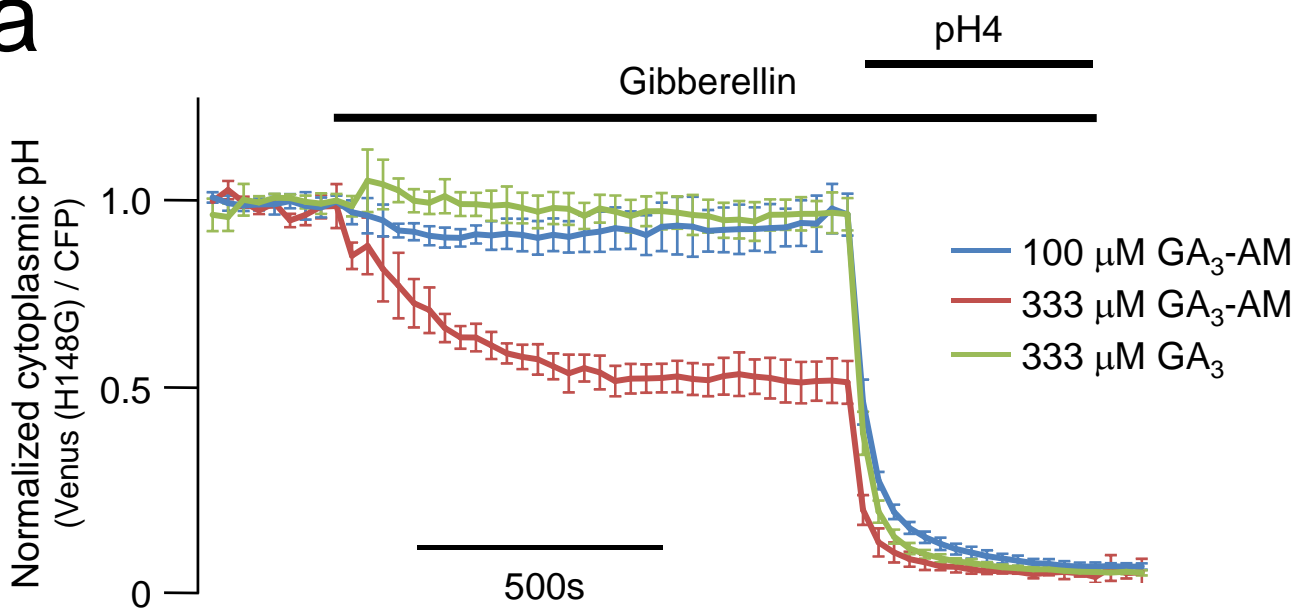**b**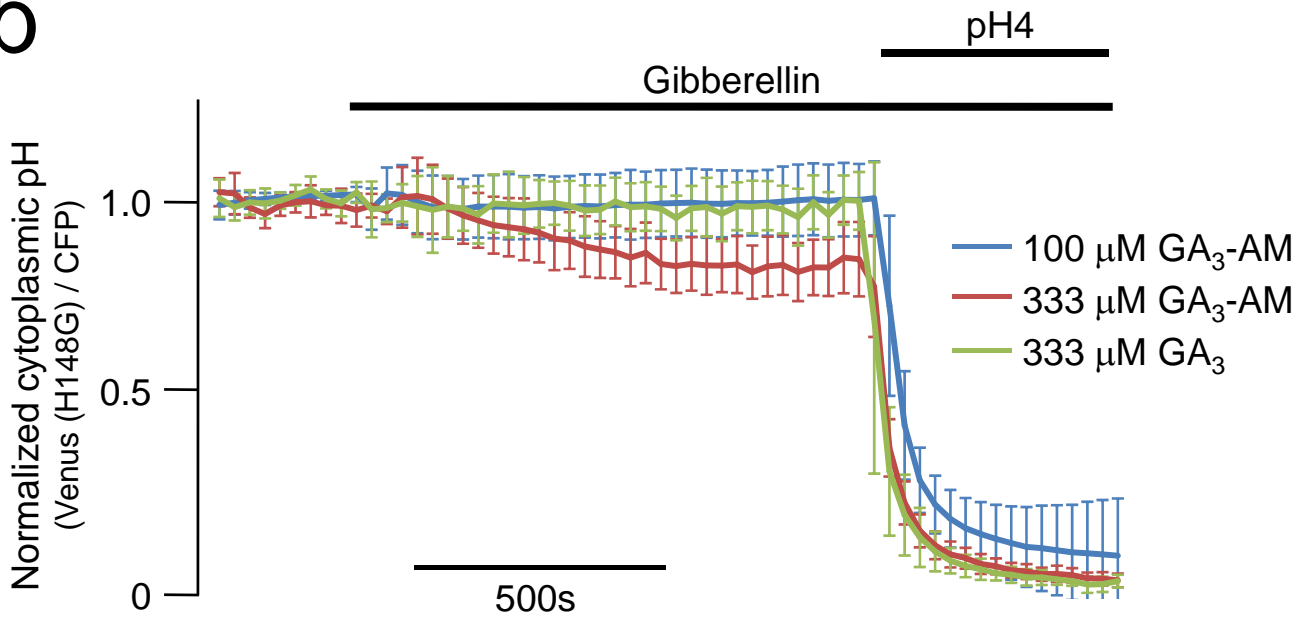

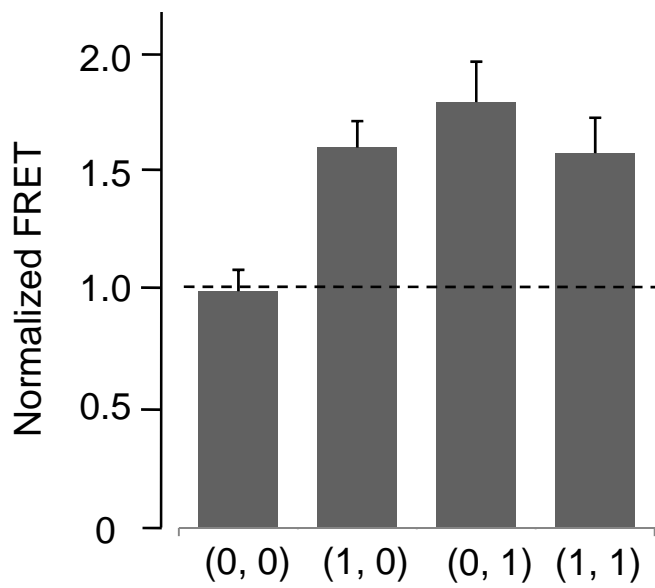

Supplement: NIHMS379747-supplement-Supplementary_figures.pdf [file NIHMS379747-supplement-Supplementary_figures.pdf]
